# Supplementary material for: Endocytosis of the Anthrax Toxin Is Mediated by Clathrin, Actin and Unconventional Adaptors
Source: PubMed Central journal article supplement (PMC2832758; doi:10.1371/journal.ppat.1000792), 2010-03-05
Supplement: ppat.1000792.s006.pdf [file ppat.1000792.s006.pdf]

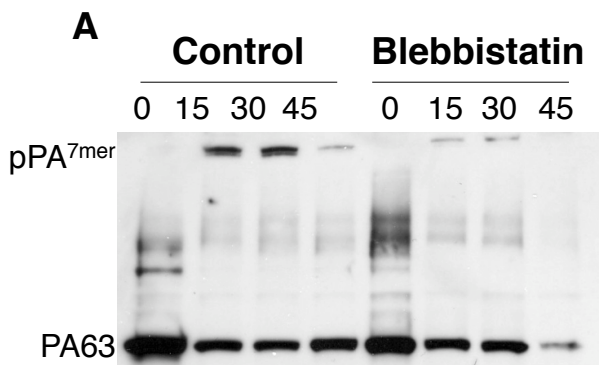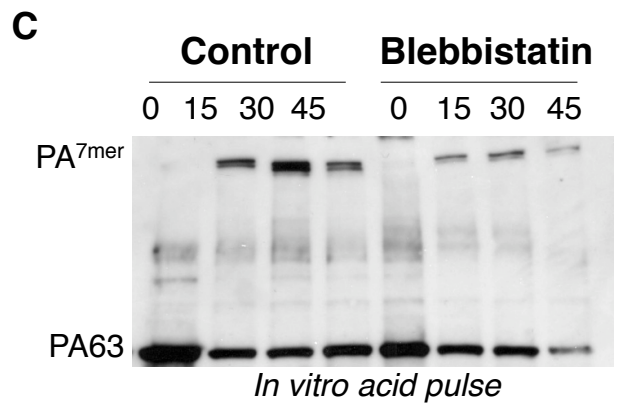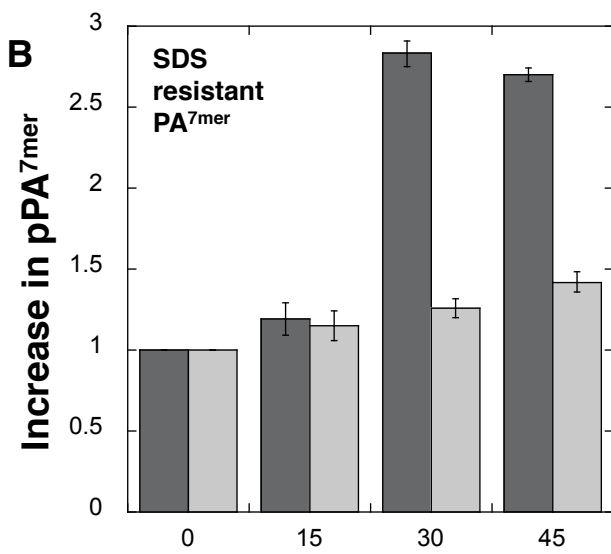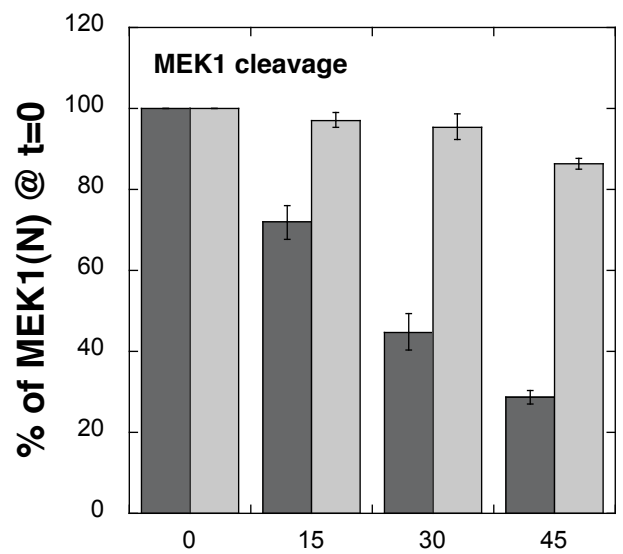

Control  
 Blebbistatin
