# Supplementary material for: Endocytosis of the Anthrax Toxin Is Mediated by Clathrin, Actin and Unconventional Adaptors
Source: PubMed Central journal article supplement (PMC2832758; doi:10.1371/journal.ppat.1000792), 2010-03-05

**A**

**Tem8-1** PLCCTVIIKEVPPPPAEESEEEEDDDGLPKKKWPTVDASYGGRGVGGIKRMEVRWG  
**Tem8-2** PLCCTVIIKEVPPPPAEESEENKIK  
**cmg2-4** PLCCKVVIKDPPPPPPPAPKEEEEEPLPTKKWPTVDASYGGRGVGGIKRMEVRWG  
  
**Tem8-1** EKGSTEEGAKLEKAKNARVKMPEQEYEFPEPRNLNNMRRPSSPRKWYSPIKGKLD  
**cmg2-4** DKGSTEEGARLEKAKNAVVKIPEETEPIRPRPPRPKPTHQPPQTKWYTPIKGRLD  
  
**Tem8-1** ALWVLLRKGYDRVSVMRPQPGDTGRCINFTRVKNNQPAKYPLNNAYHTSSPPPAPI  
**cmg2-4** ALWALLRRQYDRVSLMRPQEGDEV CIWECIEKELTA  
  
**Tem8-1** YTPPPPAPHCPPPPPSAPTPIIPSPSTLPPPPQAPPPNRAPPPSRPPRPSV

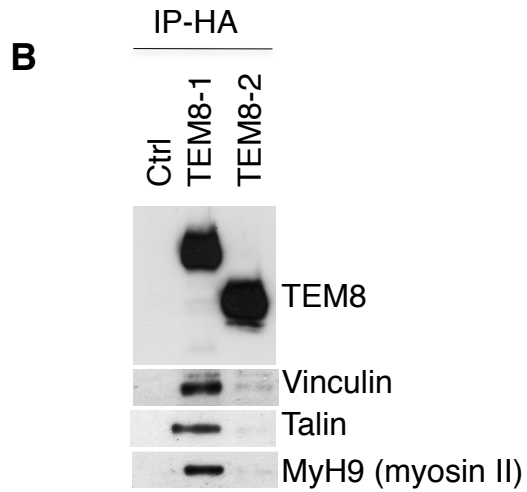

Supplement: ppat.1000792.s007.pdf [file ppat.1000792.s007.pdf]
